1 ***Arabidopsis thaliana* Zn<sup>2+</sup>-efflux ATPases HMA2 and HMA4 are required for**  
2 **resistance to the necrotrophic fungus *Plectosphaerella cucumerina* BMM**

3 Viviana Escudero<sup>1</sup>, Álvaro Castro-León<sup>1,2</sup>, Darío Ferreira Sánchez<sup>3</sup>, Isidro Abreu<sup>1</sup>, María  
4 Bernal<sup>4</sup>, Ute Krämer<sup>4</sup>, Daniel Grolimund<sup>3</sup>, Manuel González-Guerrero<sup>1,5,\*</sup>, Lucía  
5 Jordá<sup>1,5,\*</sup>

6 <sup>1</sup>Centro de Biotecnología y Genómica de Plantas (UPM-INIA), Universidad Politécnica  
7 de Madrid– Instituto Nacional de Investigación y Tecnología Agraria y Alimentaria  
8 (INIA), 28223. Pozuelo de Alarcón (Madrid), Spain.

9 <sup>2</sup>Genomics4All SL, Camino del Cerro Alto sn. Apartado 1, 45930. Méntrida. Toledo.

10 <sup>3</sup>Paul Scherrer Institute, Swiss Light Source, microXAS Beamline Project, CH-5232  
11 Villigen, Switzerland.

12 <sup>4</sup>Department of Molecular Genetics and Physiology of Plants. Ruhr University Bochum.  
13 Universitätstrasse, Bochum, Germany

14 <sup>5</sup>Departamento de Biotecnología-Biología Vegetal, Escuela Técnica Superior de  
15 Ingeniería Agronómica, Alimentaria y de Biosistemas, Universidad Politécnica de  
16 Madrid. 28040 Madrid, Spain

17 \*Corresponding authors: Lucía Jordá (+34 91 067 9156, Email: [lucia.jorda@upm.es](mailto:lucia.jorda@upm.es)),  
18 Manuel González-Guerrero (+34 91 067 9190, Email: [manuel.gonzalez@upm.es](mailto:manuel.gonzalez@upm.es)).

19

20

21

22

23

24

25

26

27

28

## 29 SUMMARY

- 30 • Zinc is an essential nutrient at low concentrations, but toxic at slightly higher ones.  
31 This could be used by plants to fight pathogens colonization.
- 32 • Elemental distribution in *Arabidopsis thaliana* leaves inoculated with the  
33 necrotrophic fungus *Plectosphaerella cucumerina* BMM (*PcBMM*) was  
34 determined and compared to mock-inoculated ones. Infection assays were carried  
35 out in wild type and long-distance zinc trafficking double mutant *hma2hma4*,  
36 defective in root-to-shoot zinc partitioning. Expression levels of genes involved  
37 in zinc homeostasis or in defence phytohormone-mediated pathways were  
38 determined.
- 39 • Zinc and manganese levels increased at the infection site. Zinc accumulation was  
40 absent in *hma2hma4*. *HMA2* and *HMA4* transcription levels were upregulated  
41 upon *PcBMM* inoculation. Consistent with a role of these genes in plant  
42 immunity, *hma2hma4* mutants were more susceptible to *PcBMM* infection,  
43 phenotype rescued upon zinc supplementation. Transcript levels of genes  
44 involved in the salicylic acid, ethylene and jasmonate pathways were  
45 constitutively upregulated in *hma2hma4* plants.
- 46 • These data are consistent with a role of zinc in plant immunity not only of  
47 hyperaccumulator plants, but also of plants containing ordinary levels of zinc.  
48 This new layer of immunity seems to run in parallel to the already characterized  
49 defence pathways, and its removal has a direct effect on pathogen resistance.

50

51 **Keywords:** zinc, innate immunity, necrotrophic fungi, Zn-ATPase, metal transport

52

53

54

55

56

57

58

## 59 INTRODUCTION

60 Zinc concentration has to be kept within a very narrow range in all cells (Frausto  
61 da Silva & Williams, 2001; Outten & O'Halloran, 2001). Low zinc levels deprive the cell  
62 of the essential cofactor of around 10 % of its proteome (Andreini *et al.*, 2006; Broadley  
63 *et al.*, 2007), including enzymes involved in stress resistance and a large number of  
64 transcription factors. However, a slight excess of intracellular zinc results in toxicity, as  
65 zinc can interfere with the uptake of other essential transition metals or displace these in  
66 the active sites of enzymes (McDevitt *et al.*, 2011; Hassan *et al.*, 2017). This dual nature  
67 of zinc seems to be used by different organisms to fend-off invading microbes. Infected  
68 hosts may withhold growth-limiting nutrients from a pathogen to starve it and control its  
69 proliferation, in what has been known as nutritional immunity. For example, mammals  
70 remove zinc to combat bacterial and fungal infections (Kehl-Fie & Skaar, 2010; Grim *et al.*,  
71 2020). Alternatively, host organisms may accumulate Zn either globally or locally in  
72 order to poison a pathogen. For example, zinc hyperaccumulator plants concentrate zinc  
73 to high levels in leaves, thus achieving some protection against herbivores, sap-feeding  
74 organisms and pathogenic microbes (Fones *et al.*, 2010; Kazemi-Dinan *et al.*, 2014;  
75 Stolpe *et al.*, 2017).

76 To date, there is only little direct evidence for zinc-mediated immunity in non-  
77 hyperaccumulator plants. For instance, *zur* (zinc uptake regulator) mutants in plant  
78 pathogens *Xanthomonas campestris* or *Xylella fastidiosa* are less virulent than wild type  
79 strains (Tang *et al.*, 2005; Navarrete & De La Fuente, 2015). This is highly suggestive of  
80 zinc playing a role in the host plant defense strategy. Zur proteins reduce zinc uptake  
81 under excess conditions and, in some species, activate the zinc detoxification machinery  
82 (Mikhaylina *et al.*, 2018). It can be hypothesized that the reduced virulence of *zur* strains  
83 is due to the lack of protection against high zinc levels in plants. However, we do not  
84 presently know whether plants accumulate zinc cations at infection sites and, if so, how  
85 this operates at the molecular level.

86 Plant zinc homeostasis has been thoroughly studied in the model *Arabidopsis*  
87 *thaliana* (Olsen & Palmgren, 2014). Uptake from the rhizosphere into the root symplasm  
88 is very likely mediated by ZIP (Zrt1-like, Irt1-like Proteins) transporters, such as AtZIP1,  
89 AtIRT3, AtZIP4, and/or AtZIP9 (Korshunova *et al.*, 1999; Lin *et al.*, 2009; Assunção *et al.*,  
90 2010). Transporting zinc in the opposite direction, MTPs (Metal Tolerance Proteins)  
91 are involved in zinc efflux from the cytosol, either into cellular compartments (storage or

92 zinc metalation) or out of the cell. For instance, AtMTP1 and AtMTP3 participate in the  
93 sequestration of zinc into vacuoles (Arrivault *et al.*, 2018; Desbrosses-Fonrouge *et al.*,  
94 2005) while AtMTP2 is involved in zinc delivery into the endoplasmic reticulum  
95 (Hanikenne *et al.*, 2008; Sinclair *et al.*, 2018). Root-to-shoot transport of zinc in the xylem  
96 is largely mediated by P<sub>1B</sub>-ATPases HMA2 and HMA4 (Hussain *et al.*, 2004). These  
97 partially redundant Zn<sup>2+</sup>-ATPases are localized in the plasma membrane of vascular cells,  
98 where they would be transporting Zn<sup>2+</sup> from the cell cytosol into the apoplast (Eren &  
99 Argüello, 2004; Hussain *et al.*, 2004). An *hma2hma4* double mutant has increased zinc  
100 levels in roots and lowered zinc levels in shoots, associated with complex alterations in  
101 transcript levels of zinc homeostasis genes (Sinclair *et al.*, 2018). Consistent with a role  
102 in zinc nutrition and distribution from roots to shoots, *hma2hma4* plants largely recover  
103 the wild type phenotype upon exogenous application of zinc (Hussain *et al.*, 2004).  
104 Transcription factors bZIP19 and bZIP23 control local transcriptional responses to zinc  
105 deficiency (Assunção *et al.*, 2010), but systemically regulated transcriptional zinc  
106 deficiency responses are independent (Sinclair *et al.*, 2018). If zinc is an integral part of  
107 plant innate immunity, it would be expected that zinc homeostasis genes, particularly  
108 those involved in long-distance metal allocation, were upregulated upon pathogen  
109 invasion.

110 In this work, we use synchrotron-based X-ray fluorescence (S-XRF) to show that  
111 zinc levels are increased at the infection site in *A. thaliana* leaves 48 hours after being  
112 inoculated with the necrotrophic fungus *Plectosphaerella cucumerina* BMM (*PcBMM*).  
113 This increase in local zinc levels requires *HMA2* and *HMA4* as indicated by the lack of  
114 zinc accumulation in double *hma2hma4* mutants. The enhanced susceptibility of  
115 *hma2hma4* double mutant plants *PcBMM* further supports a role of zinc in plant immunity  
116 and resistance to the necrotrophic fungus *PcBMM*.

117

## 118 MATERIALS AND METHODS

### 119 Plant material and growth conditions

120 Wild type *A. thaliana* Columbia-0 (Col-0) ecotype was used in this study as well  
121 as the following lines in the Col-0 background: *hma2-4*, *hma4-2*, double mutant  
122 *hma2hma4* (Hussain *et al.*, 2004), *agb1-2* (Ullah *et al.*, 2003), and *irx1-6* (Hernandez-  
123 Blanco *et al.*, 2007). The *35S:HMA2* line was in *hma2hma4* background (Hussain *et al.*,  
124 2004). Plants were sown in a mixture of peat:vermiculite (3:1), covered with sterilized

125 sand and grown in growth chambers under short day conditions (10 hours light  
126 photoperiod and  $\sim 150 \mu\text{Em}^{-2}\text{s}^{-1}$ ) at 20-22°C. For infection experiments with *PcBMM*,  
127 plants were grown in growth chambers at 22-24°C. To perform Zn complementation  
128 assays, plants were watered with 1 mM zinc twice a week.

129

### 130 **Synchrotron-based X-ray Fluorescence assays**

131 Leaves of 16-day-old *A. thaliana* were inoculated with a 2.5  $\mu\text{l}$  drop of either  
132 sterilized water (mock) or with a suspension of  $4 \times 10^6$  *PcBMM* spores/ml. Subsequently,  
133 plants were maintained under a saturated atmosphere (80-85 % relative humidity) and  
134 short-day conditions. Samples were collected prior to inoculation (0 hours-post-  
135 inoculation, hpi) or at 48 hpi. Fifteen plants per time point, treatment, and genetic  
136 background were generated. At harvest, mock or *PcBMM*-inoculated leaves were  
137 immediately covered with ultralene membrane and flash-frozen in isopentane chilled with  
138 liquid nitrogen.

139 The elemental spatial distribution was characterized by synchrotron radiation  
140 scanning micro-XRF at the Swiss Light Source (SLS; microXAS beamline, Villigen,  
141 Switzerland) in cryo-conditions (liquid nitrogen cryojet). Data were acquired with a  
142 micro-focused pencil beam with a size of about 2  $\mu\text{m}$  diameter. The excitation energies  
143 of 9.7 keV and 9.8 keV were used, which allowed the detection of elements between Si  
144 and Zn (K lines). XRF spectra were treated with PyMca software (Solé *et al.*, 2007).  
145 Incoming flux and transmitted intensities were also recorded using a micro ionization  
146 chamber and a silicon carbide diode, respectively, allowing to analyze absorption contrast  
147 simultaneously together with the XRF signal. The two-dimensional projection maps were  
148 recorded using 50  $\mu\text{m}$  of step size and a dwell time of 400 ms per pixel. Two samples  
149 were analyzed through scanning XRF approach. The lateral step-size of 5  $\mu\text{m}$  was used  
150 for the scanning tomography scans. 120 lateral projections equally spaced over 180° were  
151 measured for each of the 6 scans, each one at a different height of the sample. The  
152 tomography scan dataset was analyzed using home-made python codes, using the Astra  
153 Toolbox library (van Aarle *et al.*, 2015; van Aarle *et al.*, 2016), the SIRT method and  
154 parallel beam GPU code (Palenstijn *et al.*, 2011).

155

### 156 **Pathogenicity Assays**

157 Resistance assays with *PcBMM* were performed as described (Escudero *et al.*,  
158 2019). Briefly, *PcBMM* spores ( $4 \times 10^6$  spores/ml) were sprayed onto 16-day-old *A.*  
159 *thaliana* leaves grown under short day conditions. A minimum of 20 plants per genotype  
160 were used in each experiment. *agbl-2* (Llorente *et al.*, 2005) and *irx1-6* (Hernández-  
161 Blanco *et al.*, 2007) plants were used as susceptible and resistant controls, respectively.  
162 Plants were kept at high relative humidity for the remaining duration of the experiment.  
163 At the indicated times, shoots from at least 4 plants were collected and gDNA extracted  
164 to determine relative *PcBMM* biomass by qPCR using specific primers for  $\beta$ -*tubulin* from  
165 *PcBMM* and *UBC21* (*At5g25760*) from *A. thaliana* to normalize (Table S1). These assays  
166 were repeated in triplicate.

167

### 168 **Gene expression experiments**

169 Gene expression was determined in 48 hpi sprayed-infected and mock-inoculated  
170 16-days-old *A. thaliana* plants. Shoots and roots were collected (from at least 8 plants per  
171 independent experiment) and RNA extraction, cDNA synthesis, and qRT-PCRs were  
172 performed as reported (Jordá *et al.*, 2016). Oligonucleotides used are listed on Table S1.  
173 Gene expression was normalized with the house-keeping gene *UBC21*. The Ct values of  
174 three independent experiments were used to calculate the gene expression using the  
175  $2^{-(\Delta Ct)}$  method (Schmittgen & Livak, 2008). The results were represented as n-fold  
176 relativized with mock plants. These assays were carried out in triplicate.

177

### 178 **Statistical Tests**

179 Data were analyzed by Student's unpaired *t*-test to calculate statistical  
180 significance of observed differences. Test results with p-values  $< 0.05$  were considered  
181 as statistically significant.

182

## 183 **RESULTS**

### 184 **Enhanced zinc accumulation at leaf *PcBMM* infection site of wild-type plants is 185 abolished in *hma2 hma4* double mutants**

186 To determine whether high levels of zinc and other transition are altered upon  
187 infection, S-XRF studies were carried out in cryofixed *PcBMM*-infected leaves of wild-  
188 type plants (Col-0). In all samples, due to the abundance in cell walls, calcium distribution  
189 was used to define the general leaf shape as well as to indicate the position of *PcBMM*

190 mycelium in the leaf, as  $\text{Ca}^{2+}$  influxes are one of the hallmark early events after pathogen  
191 perception. Indeed, at 48 hours post inoculation (hpi), a high-density calcium-rich spot  
192 could be observed in wild type *A. thaliana* leaves, but not in mock-inoculated ones (Fig.  
193 1), coincident with the position in which the fungal hyphae were growing. Interestingly,  
194 marked increases in zinc and manganese concentrations were also detected in the same  
195 positions, although at lower magnitudes and with a pattern that might be associated to the  
196 leaf veins. Manganese and zinc-enrichment at the infection sites were also present at  
197 lower levels at the earlier 24 hpi time point (Fig. S1). Tomographic reconstructions of  
198 different fluorescence sections showed that both transition metals located to the surface  
199 of the leaf, where the spores germinated, and the mycelium was proliferating (Fig. S2).  
200 No other transition metal was observed at high levels at the time points analysed (Fig.  
201 S3).

202 The transporters HMA2 and HMA4 make the predominant contribution to root-  
203 to-shoot translocation of zinc (Hussain *et al.*, 2004). HMA2 also has a very modest  $\text{Mn}^{2+}$   
204 transport capability (Eren & Argüello, 2004). Therefore, these two proteins are likely  
205 candidates of zinc, and perhaps manganese, accumulation at the infection site. Notably,  
206 48 hpi *hma2hma4* mutant leaves did not show the localized enhanced zinc levels observed  
207 in Col-0 (Fig. 1), whereas accumulation of calcium and manganese were still abundant  
208 and reached similar levels to that of wild-type plants. Infection-induced zinc  
209 accumulation was restored to levels indistinguishable from the wild type in *hma2 hma4*  
210 plants into which *HMA2* had been reintroduced under the control of a 35S promoter.

211

## 212 ***HMA2* and *HMA4* are required for *A. thaliana* resistance to *PcBMM***

213 Enhanced zinc allocation to the infection site is suggestive of an up-regulation in  
214 the transcription levels of at least one of these  $\text{Zn}^{2+}$ -ATPases. Real-time RT-PCR analyses  
215 of leaves at 48 hpi showed a consistent and significant induction of the transcription of  
216 both genes. *HMA2* transcript levels were up-regulated over two-fold in both shoots and  
217 roots of plants infected with *PcBMM* in comparison to mock-treated plants at 48 hpi (Fig.  
218 2A). *HMA4* expression was highly up-regulated in roots of infected plants, but not in  
219 shoots (Fig. 2B). In contrast, transcript levels of other genes implicated in zinc transport  
220 and its regulation were not significantly changed in *PcBMM*-infected compared to mock  
221 inoculated plants (Fig. S4). This included genes with roles under zinc deficiency (*bZIP19*,

222 *bZIP23*, *ZIP4*, *ZIP9*, or *MTP2*) as well as in detoxification (*MTP1*, *MTP3*) (Desbrosses-  
223 Fonrouge *et al.*, 2005; Arrivault *et al.*, 2006; Assunção *et al.*, 2010; Sinclair *et al.*, 2018).

224 These data are consistent with a role for *HMA2* and *HMA4* in zinc mobilization to  
225 the infection site, regulated at the transcript level, as part of the Arabidopsis innate  
226 immune response. To further test this possibility, wild type, *hma2*, *hma4*, *hma2hma4*, and  
227 *35S::HMA2* in *hma2hma4* background were sprayed-inoculated with *PcBMM*. Fungal  
228 biomass was determined in leaves at 5 days-post-inoculation (dpi) by the relative ratio of  
229 fungal vs plant gDNA using qPCR (Fig. 3A). As expected, *hma2hma4* had a higher  
230 pathogen proliferation, similar to what is observed in the hypersusceptible mutant *agbl1*-  
231 2. Single mutants *hma2* and *hma4* had a very similar response to *PcBMM* than Col-0  
232 wild-type plants, indicating that HMA2 and HMA4 have redundant functions in immune  
233 responses to this fungus. Of note, *35S::HMA2 hma2hma4* plants overexpressing *HMA2*  
234 recovered the disease resistance level of wild-type plants (Col-0), further confirming the  
235 functionality of *HMA2* in disease resistance to *PcBMM*. These observations were also  
236 supported by visual evaluation of the macroscopic symptoms in infected plants compared  
237 to the mock-inoculated controls (Fig. 3B).

238 The growth defect of *hma2hma4* mutants has been demonstrated to be restored by  
239 supplementing the irrigation water with zinc (Hussain *et al.*, 2004). Similarly, when  
240 *hma2hma4* plants were watered with 1 mM zinc, their susceptibility to *PcBMM* was  
241 ameliorated. Double mutant plants watered with additional zinc had a severe reduction in  
242 fungal proliferation at 5 dpi (Fig. 4A), and their defence response was completely restored  
243 to wild type levels. Also, the overall look of these plants was much healthier than when  
244 no zinc was added to irrigation water (Fig. 4B).

245

#### 246 **Mutations in *HMA2* and *HMA4* lead to transcriptional activation of defence genes**

247 Plant hormones play central roles in modulating defence resistance mechanisms upon  
248 pathogen perception (Bürger & Chory, 2019). Among them, the ethylene (ET), jasmonic  
249 acid (JA), abscisic acid (ABA) and salicylic acid-mediated pathways orchestrate a  
250 complex network that contributes to plant immunity. Alterations in any of these  
251 phytohormone pathways diminishes resistance to pathogens, including the necrotrophic  
252 fungus *PcBMM* (Nawrath & Métraux, 1999; Adie *et al.*, 2007; Hernandez-Blanco *et al.*,  
253 2007; Sanchez-Vallet *et al.*, 2010). To test whether the enhanced susceptibility of



254 *hma2hma4* plants was due to alterations in any of the main defence signalling pathways,  
255 we quantified the expression of the following signature genes *PR1* (SA), *PDF1.2* (ET and  
256 JA), *LOX2* (JA) and *RD22* (ABA) in wild type and mutant plants under mock and  
257 *PcBMM*-inoculated conditions. Figure 5A shows that no significant differences could be  
258 observed in the expression levels of the *RD22* gene between *hma2hma4* and wild type  
259 plants, while, *PR1*, *PDF1.2* and *LOX2* were highly expressed in mock inoculated  
260 *hma2hma4* compared to Col-0 plants. This up-regulation in *hma2hma4* was maintained  
261 for *PR1* when the plants were infected with the necrotrophic fungus (Fig. 5B), but no  
262 additional induction was observed for *LOX2* or *RD22*. Besides, the *hma2hma4* mutant  
263 showed a strong repression in the expression of the *PDF1.2* gene after infection with the  
264 pathogen.

265

## 266 **DISCUSSION**

267 Life walks a narrow edge between zinc toxicity and zinc deficiency (Frausto da  
268 Silva & Williams, 2001). This can be used to combat invading microbes. Zinc deficiency  
269 can be produced locally to starve the invader (Kehl-Fie & Skaar, 2010), while it might  
270 also be increased to toxic levels to eliminate it (Fones *et al.*, 2010). Both strategies seem  
271 to be used in innate immunity. Zinc deficiency is favored in mammal immune systems  
272 (Kehl-Fie & Skaar, 2010; Hood & Skaar, 2012), while plants, and not only the zinc  
273 hyperaccumulators (Fones *et al.*, 2010; Kazemi-Dinan *et al.*, 2014; Stolpe *et al.*, 2017),  
274 seem to prefer the toxicity approach.

275 Our data shows that zinc and manganese are locally increased at *PcBMM* infection  
276 sites of leaves. The *hma2hma4* mutant is unable to mount a local increase in zinc levels  
277 at the infection site, and it is more susceptible to infection by the necrotrophic fungus  
278 *PcBMM*. Wild-type levels of resistance were restored in the *hma2hma4* mutant by  
279 application of exogenous zinc or constitutive overexpression of *HMA2* in the *hma2hma4*  
280 background. Two alternative and not incompatible explanations can be offered for these  
281 observations: i) Arabidopsis is using large amounts of zinc-proteins to combat *PcBMM*  
282 infection, or ii) Arabidopsis is using zinc to poison the invader. Within the first  
283 hypothesis, zinc limitation in the *hma2hma4* mutants could reduce the activity of one or  
284 several zinc-proteins required for resistance to *PcBMM*. In this sense, PDF1.2 and other  
285 defensins have been shown to be able to bind zinc and to play a role in plant immunity  
286 and plant zinc tolerance (Shahzad *et al.*, 2013). However, this explanation would require

287 the expression and concentration at the infection site of a large amount of zinc-proteins  
288 to account for the large increase of zinc at the infection site. Furthermore, it does not  
289 explain why pathogen strains in high risk of zinc toxicity are less virulent (Tang *et al.*,  
290 2005; Navarrete & De La Fuente, 2015).

291 The alternative hypothesis suggests that a large portion of the zinc observed at the  
292 infection site would be free, hydrated. HMA2 and HMA4 would increase zinc  
293 concentrations to toxic levels for *PcBMM*. In this scenario it would be expected that the  
294 ability to detoxify this element would provide a competitive edge, what agrees with  
295 reports that plant pathogens require zinc detoxification systems for efficient virulence  
296 (Tang *et al.*, 2005; Navarrete & De La Fuente, 2015). More recently, it has been shown  
297 that a *PcBMM* CDF/MTP gene (*PcBMM\_CBGP\_AIM006405*) is induced when infecting  
298 *Arabidopsis* leaves compared to free-living conditions (Muñoz-Barrios *et al.*, 2020).  
299 Considering that CDF/MTP genes are involved in zinc detoxification, this is further  
300 indication of *PcBMM* facing high zinc levels at the infection site. The general pattern of  
301 pathogen protection against excess zinc as part of bacterial and fungal infection processes,  
302 indicates that zinc-mediated immunity would be a more general process not only limited  
303 to *PcBMM*. This use of zinc in plant immunity contrasts to what has been predominantly  
304 reported with animal pathogens, in which the ability to bind and uptake zinc with high  
305 affinity is a necessary requirement (Neumann *et al.*, 2017; Zackular *et al.*, 2020).

306 Manganese also accumulates at the infection site at similar time and at higher  
307 concentrations as zinc, what could indicate a role in *PcBMM* resistance. Further analyses  
308 in manganese transporter mutants might also yield similar results for manganese-  
309 mediated immunity. At the timepoints analysed in our S-XRF experiments, we did not  
310 observe any major changes in the distribution of iron or copper, in spite of existing  
311 literature indicating that it should be present. Upon phytopathogenic enterobacteria attack,  
312 *Arabidopsis* removes iron from the infection site to starve the invader (Aznar *et al.*, 2014;  
313 Aznar *et al.*, 2015), while copper levels should be increased as indicated by the loss of  
314 virulence in *Arabidopsis* of *Pseudomonas aeruginosa* that lose some of their copper-  
315 detoxification systems (González-Guerrero *et al.*, 2010). It is possible that infection-  
316 dependent changes in iron or copper localization in *Arabidopsis* leaves occurred, but were  
317 below our detection limits or occurred at time points other than 48 hpi.

318 *Arabidopsis* zinc-mediated immunity do not seem to be under the control of the  
319 known regulatory pathways of zinc homeostasis. Out of all zinc homeostasis genes tested,

320 transcript levels responded to *PcBMM* infection only for *HMA2*, with mild increases in  
321 both roots and shoots, and *HMA4*, with a large increase confined to roots. Transcript  
322 levels of genes contributing to root zinc uptake from soil were not increased in response  
323 to infection (*IRT3*, *ZIP1*, *ZIP14*, *ZIP19*). Similarly, expression levels of genes encoding  
324 the transcription factors controlling locally regulated zinc deficiency responses (*bZIP19*  
325 and *bZIP23*) were unchanged. Gene expression of *MTP2* reflecting a systemically  
326 regulated zinc deficiency response was also unaltered in response to infection. Zinc  
327 detoxification, or vacuolar zinc sequestration (*MTP1* and *MTP3*), as a protecting  
328 mechanism against zinc toxicity was not transcriptionally increased, either. The  
329 transcriptional upregulation in roots of the  $Zn^{2+}$ -ATPases when the pathogen is only  
330 applied in shoots illustrates that some systemic signaling occurs.

331 Our results indicate that zinc-mediated resistance is a fundamental mechanism in  
332 Arabidopsis innate immunity, as mutants impaired in the  $Zn^{2+}$ -ATPases *HMA2* and  
333 *HMA4* are highly susceptible to *PcBMM*, despite presenting an upregulation of three of  
334 the main defence signalling pathways (SA, JA and ET). The higher expression levels of  
335 *PRI*, *PDF1.2*, and *LOX2* would reflect an attempt by the host plant to compensate for the  
336 lack of zinc-mediated immunity. However, this compensatory mechanism would not be  
337 sufficient to control fungal colonization of the double mutant plants. These data illustrate  
338 the relevant role of zinc to combat *PcBMM*. It should be noted that *hma2hma4* mutants  
339 are unable to activate *PDF1.2* marker gene expression after pathogen inoculation, in  
340 contrast to wild plants, suggesting a possible defect in the ET/JA signalling pathways,  
341 required for *PDF1.2* regulation. However, the expression levels of *PDF1.2* in the double  
342 mutant prior infection were higher than in Col-0 plants, suggesting that the defective up-  
343 regulation of *PDF1.2* only take place after pathogen reception. Future work will be  
344 directed to unveiling the connection of zinc-mediated immunity with the complex  
345 phytohormone-mediated defence signaling pathways.

346 Regardless of the specific mechanism, it seems that zinc transport via *HMA2* and  
347 *HMA4* is important for plant immunity, and that zinc itself might control fungal infection,  
348 as supported by the use of zinc-protective measures in plant pathogens (Tang *et al.*, 2005;  
349 Navarrete & De La Fuente, 2015; Muñoz-Barrios *et al.*, 2020). In addition to this process,  
350 yet-to-be-unveiled zinc-proteins might also be participating in *PcBMM* tolerance. Since  
351 zinc is a limiting nutrient (Alloway, 2008), it is intriguing why zinc has an important role  
352 in resistance to a pathogen instead of a more plentiful element. Perhaps the answer lies in

353 its scarcity, to which most organisms are typically adapted so that they tend to accumulate  
354 it. It could also be that zinc toxicity takes advantage of the iron nutritional immunity in  
355 plants (Aznar *et al.*, 2014; Aznar *et al.*, 2015). Upon invading the host, a pathogen would  
356 up-regulate their iron uptake systems to ensure sufficient iron supply in the host  
357 environment. At the same time, this would make a pathogen more sensitive to zinc, since  
358 many iron transporters permeate other divalent metals as secondary substrates (Guerinot,  
359 2000; Forbes & Gros, 2001; Nevo & Nelson, 2006), particularly if present at sufficiently  
360 high concentrations. This model could also explain manganese accumulation at the  
361 infection site. Zinc-mediated immunity may open up new strategies against plant  
362 pathogens using proper application of zinc enriched fertilizers.

363

### 364 **ACKNOWLEDGEMENTS**

365 This work has been financially supported by the "Severo Ochoa Programme for  
366 Centres of Excellence in R&D" from the Agencia Estatal de Investigación of Spain (grant  
367 SEV-2016-0672 (2017-2021) to the CBGP). In the frame of this program Viviana  
368 Escudero was hired with a postdoctoral contract. Álvaro Castro-León was supported by  
369 an Industrial Doctorate in partnership with Genomics4All awarded by Comunidad de  
370 Madrid (IND2019/BIO-17117). Isidro Abreu was the recipient of a Juan de la Cierva-  
371 Formación postdoctoral fellowship from Ministerio de Ciencia, Innovación y  
372 Universidades (FJCI-2017-33222). We acknowledge the Paul Scherrer Institut, Villigen,  
373 Switzerland for provision of synchrotron radiation beamtime at beamline microXAS,  
374 accessed gained through proposals 20190571 and 20180921. The research leading to part  
375 of the SXRF data has received funding from the European Union's Horizon 2020 research  
376 and innovation programme under grant agreement number 730872, project  
377 CALIPSOplus. We would also like to acknowledge Dr. Antonio Molina for critical  
378 reading of the manuscript, and the rest of members of M. González-Guerrero laboratory  
379 at Centro de Biotecnología y Genómica de Plantas (UPM-INIA) for their support and  
380 feedback in preparing this manuscript.

381

### 382 **AUTHOR CONTRIBUTION**

383 VE carried out most of the experimental work with AC-L assisting in some of the  
384 infection assays. DF, IA, and DG helped in the beamtime experiments, facilitating the set

385 up and data analyses. MB and UK provided the zinc mutants used, participated in the  
386 experimental design of the zinc resistance assays, and edited the manuscript. VE, MG-G,  
387 and LJ conceived the project with input from MB, and UK. MG-G and LJ coordinated  
388 the work and wrote the manuscript with the figures being prepared by VE, except Fig. 1  
389 and 2 being produced by DF. All authors have read and approved this manuscript.

390

391 **The following Supporting Information is available for this article:**

392 **Fig. S1** Localized zinc and manganese accumulation can be detected at the inoculation  
393 site at 24 hpi with *PcBMM* in *A. thaliana* leaves.

394 **Fig. S2** Zinc and manganese accumulation takes place in the epidermal cell layer.

395 **Fig. S3** Arabidopsis leaves do not accumulate iron or copper at the infection site with  
396 *PcBMM* at 48hpi.

397 **Fig. S4.** Expression levels of other zinc homeostasis genes in roots and shoots of mock-  
398 inoculated and *PcBMM*-infected plants.

399 **Table S1.** Primers used in this study.

400

401

402

403

404

405

406

407

408

409

410

411

412

413 **REFERENCES**

- 414 **Adie BA, Pérez-Pérez J, Pérez-Pérez MM, Godoy M, Sánchez-Serrano JJ, Schmelz**  
415 **EA, Solano R. 2007.** ABA is an essential signal for plant resistance to pathogens  
416 affecting JA biosynthesis and the activation of defenses in Arabidopsis. *Plant Cell*  
417 19: 1665-1681.
- 418 **Alloway BJ. 2008.** Zinc in soils and crop nutrition, 2nd Ed: International Zinc  
419 Association and International Fertilizer Industry Association.
- 420 **Andreini C, Banci L, Bertini I, Rosato A. 2006.** Zinc through the three domains of life.  
421 *Journal of Proteome Research* 5: 3173-3178.
- 422 **Arrivault S, Senger T, Krämer U. 2006.** The Arabidopsis metal tolerance protein  
423 AtMTP3 maintains metal homeostasis by mediating Zn exclusion from the shoot  
424 under Fe deficiency and Zn oversupply. *Plant Journal* 46: 861-879.
- 425 **Assunção AGL, Herrero E, Lin Y-F, Huettel B, Talukdar S, Smaczniak C, Immink**  
426 **RGH, van Eldik M, Fiers M, Schat H, et al. 2010.** *Arabidopsis thaliana*  
427 transcription factors bZIP19 and bZIP23 regulate the adaptation to zinc  
428 deficiency. *Proceedings of the National Academy of Sciences USA* 107: 10296-  
429 10301.
- 430 **Aznar A, Chen NWG, Rigault M, Riache N, Joseph D, Desmaële D, Mouille G,**  
431 **Boutet S, Soubigou-Taconnat L, Renou J-P, et al. 2014.** Scavenging iron: A  
432 novel mechanism of plant immunity activation by microbial siderophores. *Plant*  
433 *Physiology* 164: 2167-2183.
- 434 **Aznar A, Chen NWG, Thomine S, Dellagi A. 2015.** Immunity to plant pathogens and  
435 iron homeostasis. *Plant Science* 240: 90-97.
- 436 **Broadley MR, White PJ, Hammond JP, Zelko I, Lux A. 2007.** Zinc in plants. *New*  
437 *Phytologist* 173: 677-702.
- 438 **Bürger M, Chory J. 2019.** Stressed out about hormones: How plants orchestrate  
439 immunity. *Cell Host Microbe* 26: 163-172.
- 440 **Desbrosses-Fonrouge AG, Voigt K, Schroder A, Arrivault S, Thomine S, Kramer U.**  
441 **2005.** *Arabidopsis thaliana* MTP1 is a Zn transporter in the vacuolar membrane  
442 which mediates Zn detoxification and drives leaf Zn accumulation. *FEBS Letters*  
443 579: 4165-4174.

- 444 **Eren E, Argüello JM. 2004.** Arabidopsis HMA2, a divalent heavy metal-transporting  
445 PIB-type ATPase, is involved in cytoplasmic Zn<sup>2+</sup> homeostasis. *Plant Physiology*  
446 136: 3712-3723.
- 447 **Escudero V, Torres M, Delgado M, Sopena-Torres S, Swami S, Morales J, Muñoz-**  
448 **Barrios A, Mélida H, Jones AM, Jordá L, et al. 2019.** Mitogen-Activated  
449 Protein Kinase Phosphatase 1 (MKP1) negatively regulates the production of  
450 reactive oxygen species during Arabidopsis immune responses. *Molecular Plant-*  
451 *Microbe Interactions* 32: 464-478.
- 452 **Fones H, Davis CAR, Rico A, Fang F, Smith JAC, Preston GM. 2010.** Metal  
453 hyperaccumulation armors plants against disease. *PLoS Pathogens* 6: e1001093.
- 454 **Forbes JR, Gros P. 2001.** Divalent-metal transport by NRAMP proteins at the interface  
455 of host-pathogen interactions. *Trends in Microbiology* 9: 397-403.
- 456 **Frausto da Silva JJR, Williams RJP. 2001.** The Biological Chemistry of the Elements.  
457 Oxford University Press.
- 458 **González-Guerrero M, Raimunda D, Cheng X, Argüello JM. 2010.** Distinct  
459 functional roles of homologous Cu<sup>+</sup> efflux ATPases in *Pseudomonas aeruginosa*.  
460 *Molecular Microbiology* 78: 1246-1258.
- 461 **Grim KP, Radin JN, Solórzano PKP, Morey JR, Frye KA, Ganio K, Neville SL,**  
462 **McDevitt CA, Kehl-Fie TE. 2020.** Intracellular accumulation of staphylopin  
463 can sensitize *Staphylococcus aureus* to host-imposed zinc starvation by chelation-  
464 independent toxicity. *Journal of Bacteriology* 202: e00014-00020.
- 465 **Guerinot ML. 2000.** The ZIP family of metal transporters. *Biochimica et Biophysica*  
466 *Acta* 1465: 190-198.
- 467 **Guerinot ML, Eide D. 1999.** Zeroing in on zinc uptake in yeast and plants. *Current*  
468 *Opinion on Plant Biology*. 2: 244-249.
- 469 **Hanikenne M, Talke IN, Haydon MJ, Lanz C, Nolte A, Motte P, Kroymann J,**  
470 **Weigel D, Krämer U. 2008.** Evolution of metal hyperaccumulation required cis-  
471 regulatory changes and triplication of HMA4. *Nature* 453: 391-395.
- 472 **Hassan KA, Pederick VG, Elbourne LDH, Paulsen IT, Paton JC, McDevitt CA,**  
473 **Eijkelkamp BA. 2017.** Zinc stress induces copper depletion in *Acinetobacter*  
474 *baumannii*. *BMC Microbiology* 17: 59.

- 475 **Hernandez-Blanco C, Feng DX, Hu J, Sanchez-Vallet A, Deslandes L, Llorente F,**  
476 **Berrocal-Lobo M, Keller H, Barlet X, Sanchez-Rodriguez C, et al. 2007.**  
477 Impairment of cellulose synthases required for Arabidopsis secondary cell wall  
478 formation enhances disease resistance. *Plant Cell* 19: 890-903.
- 479 **Hood MI, Skaar EP. 2012.** Nutritional immunity: transition metals at the pathogen–host  
480 interface. *Nature Reviews Microbiology* 10: 525-537.
- 481 **Hussain D, Haydon MJ, Wang Y, Wong E, Sherson SM, Young J, Camakaris J,**  
482 **Harper JF, Cobbett CS. 2004.** P-Type ATPase heavy metal transporters with  
483 roles in essential zinc homeostasis in *Arabidopsis*. *Plant Cell* 16: 1327-1339.
- 484 **Jordá L, Sopena-Torres S, Escudero V, Nuñez-Corcuera B, Delgado-Cerezo M,**  
485 **Torii KU, Molina A. 2016.** ERECTA and BAK1 Receptor Like Kinases Interact  
486 to Regulate Immune Responses in Arabidopsis. *Frontiers in Plant Science* 7: 897.
- 487 **Kazemi-Dinan A, Thomaschky S, Stein RJ, Krämer U, Müller C. 2014.** Zinc and  
488 cadmium hyperaccumulation act as deterrents towards specialist herbivores and  
489 impede the performance of a generalist herbivore. *New Phytologist* 202: 628-639.
- 490 **Kehl-Fie TE, Skaar EP. 2010.** Nutritional immunity beyond iron: a role for manganese  
491 and zinc. *Current Opinion in Chemical Biology* 14: 218-224.
- 492 **Korshunova YO, Eide D, Clark WG, Guerinot ML, Pakrasi HB. 1999.** The IRT1  
493 protein from *Arabidopsis thaliana* is a metal transporter with a broad substrate  
494 range. *Plant Molecular Biology* 40: 37-44.
- 495 **Lin Y-F, Liang H-M, Yang S-Y, Boch A, Clemens S, Chen C-C, Wu J-F, Huang J-**  
496 **L, Yeh K-C. 2009.** Arabidopsis IRT3 is a zinc-regulated and plasma membrane  
497 localized zinc/iron transporter. *New Phytologist* 182: 392-404.
- 498 **Liu HF, Xue XJ, Yu Y, Xu MM, Lu CC, Meng XL, Zhang BG, Ding XH, Chu ZH.**  
499 **2020.** Copper ions suppress abscisic acid biosynthesis to enhance defence against  
500 *Phytophthora infestans* in potato. *Molecular Plant Pathology* 21: 636-651.
- 501 **Llorente F, Alonso-Blanco C, Sanchez-Rodriguez C, Jorda L, Molina A. 2005.**  
502 ERECTA receptor-like kinase and heterotrimeric G protein from Arabidopsis are  
503 required for resistance to the necrotrophic fungus *Plectosphaerella cucumerina*.  
504 *Plant J* 43(2): 165-180.



- 505 **Mauch-Mani B, Baccelli I, Luna E, Flors V. 2017.** Defense priming: An adaptive part  
506 of induced resistance. *Annual Review of Plant Biology* 68: 485-512.
- 507 **McDevitt CA, Ogunniyi AD, Valkov E, Lawrence MC, Kobe B, McEwan AG, Paton**  
508 **JC. 2011.** A molecular mechanism for bacterial susceptibility to zinc. *PLOS*  
509 *Pathogens* 7: e1002357.
- 510 **Mikhaylina A, Ksibe AZ, Scanlan DJ, Blindauer CA. 2018.** Bacterial zinc uptake  
511 regulator proteins and their regulons. *Biochemical Society Transactions* 46: 983-  
512 1001.
- 513 **Muñoz-Barrios A, Sopeña-Torres S, Ramos B, López G, del Hierro García I, Díaz-**  
514 **González S, González-Melendi P, Mélida H, Fernández-Calleja V, Mixao V,**  
515 **Martín Dacal M, Marcet-Houben M, Gabaldón T, Sacristán S, Molina A.**  
516 **2020.** Differential expression of fungal genes determines the lifestyle of  
517 *Plectosphaerella* strains during *Arabidopsis thaliana* colonization. *Molecular*  
518 *Plant-Microbe Interactions* doi:10.1094/MPMI-03-20-0057-R .
- 519 **Navarrete F, De La Fuente L. 2015.** Zinc detoxification is required for full virulence  
520 and modification of the host leaf ionome by *Xylella fastidiosa*. *Molecular Plant-*  
521 *Microbe Interactions* 28: 497-507.
- 522 **Nawrath C, Métraux JP. 1999.** Salicylic acid induction-deficient mutants of  
523 *Arabidopsis* express PR-2 and PR-5 and accumulate high levels of camalexin after  
524 pathogen inoculation. *Plant Cell* 11: 1393-1404.
- 525 **Neumann W, Hadley Rose C, Nolan Elizabeth M. 2017.** Transition metals at the host-  
526 pathogen interface: how *Neisseria* exploit human metalloproteins for acquiring  
527 iron and zinc. *Essays in Biochemistry* 61: 211-223.
- 528 **Nevo Y, Nelson N. 2006.** The NRAMP family of metal-ion transporters. *Biochimica et*  
529 *Biophysica Acta* 1763: 609-620.
- 530 **Olsen LI, Palmgren MG. 2014.** Many rivers to cross: the journey of zinc from soil to  
531 seed. *Frontiers in Plant Science* 5: 30.
- 532 **Outten CE, O'Halloran TV. 2001.** Femtomolar sensitivity of metalloregulatory proteins  
533 controlling zinc homeostasis. *Science* 292: 2488-2492.

- 534 **Palenstijn WJ, Batenburg KJ, Sijbers J. 2011.** Performance improvements for iterative  
535 electron tomography reconstruction using graphics processing units (GPUs).  
536 *Journal of Structural Biology* 176: 250-253.
- 537 **Sanchez-Vallet A, Ramos B, Bednarek P, López G, Piślewska-Bednarek M, Schulze-**  
538 **Lefert P, Molina A. 2010.** Tryptophan-derived secondary metabolites in  
539 *Arabidopsis thaliana* confer non-host resistance to necrotrophic *Plectosphaerella*  
540 *cucumerina* fungi. *Plant Journal* 63: 115-127.
- 541 **Schmittgen TD, Livak KJ. 2008.** Analyzing real-time PCR data by the comparative  
542 C(T) method. *Nature Protocols* 3: 1101-1108.
- 543 **Sinclair SA, Senger T, Talke IN, Cobbett CS, Haydon MJ, Krämer U. 2018.** Systemic  
544 Upregulation of MTP2- and HMA2-mediated Zn partitioning to the shoot  
545 supplements local zn deficiency responses. *Plant Cell* 30: 2463.
- 546 **Solé VA, Papillon E, Cotte M, Walter P, Susini JA. 2007.** A multiplatform code for  
547 the analysis of energy-dispersive X-ray fluorescence spectra. *Spectrochimica Acta*  
548 *Part B: Atomic Spectroscopy* 62: 63-68.
- 549 **Stolpe C, Giehren F, Krämer U, Müller C. 2017.** Both heavy metal-amendment of soil  
550 and aphid-infestation increase Cd and Zn concentrations in phloem exudates of a  
551 metal-hyperaccumulating plant. *Phytochemistry* 139: 109-117.
- 552 **Tang D-J, Li X-J, He Y-Q, Feng J-X, Chen B, Tang J-L. 2005.** The Zinc Uptake  
553 Regulator Zur is essential for the full virulence of *Xanthomonas campestris* pv.  
554 *campestris*. *Molecular Plant-Microbe Interactions* 18: 652-658.
- 555 **Ullah H, Chen J-G, Temple B, Boyes DC, Alonso JM, Davis KR, Ecker JR, Jones**  
556 **AM. 2003.** The  $\beta$ -subunit of the Arabidopsis G protein negatively regulates auxin-  
557 induced cell division and affects multiple developmental processes. *Plant Cell* 15:  
558 393.
- 559 **van Aarle W, Palenstijn WJ, Cant J, Janssens E, Bleichrodt F, Dabravolski A, De**  
560 **Beenhouwer J, Joost Batenburg K, Sijbers J. 2016.** Fast and flexible X-ray  
561 tomography using the ASTRA toolbox. *Optics Express* 24: 25129-25147.
- 562 **van Aarle W, Palenstijn WJ, De Beenhouwer J, Altantzis T, Bals S, Batenburg KJ,**  
563 **Sijbers J. 2015.** The ASTRA Toolbox: A platform for advanced algorithm  
564 development in electron tomography. *Ultramicroscopy* 157: 35-47.

565 **Zackular JP, Knippel RJ, Lopez CA, Beavers WN, Maxwell CN, Chazin WJ, Skaar**  
566 **EP. 2020.** ZupT facilitates *Clostridioides difficile* resistance to host-mediated  
567 nutritional immunity. *mSphere* 5: e00061-00020.

568

569

570

571

572

573

574

575

576

577

578

579

580

581

582

583

584

585

586

587

588

589

590

591

## 592 FIGURE LEGENDS

593 **Figure 1.** Zinc and manganese accumulate locally at the *PcBMM* infection site in *A.*  
594 *thaliana* leaves. Synchrotron-based X-ray fluorescence images of leaves of wild type Col-  
595 0 (WT), *hma2hma4* mutant, and the *hma2hma4* mutant expressing a wild type copy of  
596 the *HMA2* cDNA under a 35S promoter (*35S::HMA2*) 48 hours post inoculation with  
597 *PcBMM* or mock-treated. Left column shows the calcium distribution; centre,  
598 manganese; and right, zinc. Position of the calcium-rich spots is surrounded by the dashed  
599 line. Units indicate number of photon counts. Each image is the representative of three  
600 images taken from a randomly chosen leaf, each from a different Arabidopsis plant for  
601 each of the treatments and genotypes analysed.

602 **Figure 2.** *HMA2* and *HMA4* are up-regulated upon *PcBMM* infection. (A) Expression of  
603 *HMA2* in 48 hpi shoots and roots normalized to mock inoculated plants. Data shows the  
604 mean  $\pm$  SE of five independent infection assays, with tissues from 8-10 plants pooled per  
605 experiment. (B) Expression of *HMA4* in 48 hpi shoots and roots relativized to mock  
606 inoculated plants. Data shows the mean  $\pm$  SE of three independent infection experiments,  
607 in each of them collecting 8-10 pooled plants. \* indicates statistically significant  
608 difference from mock-infected plants according to Student's *t*-test (*p* -value < 0.05).

609 **Figure 3.** Mutants impaired in Zn<sup>2+</sup>-efflux ATPases *HMA2* and *HMA4* are more  
610 susceptible to infection by the necrotrophic fungus *PcBMM*. (A) quantification of  
611 *PcBMM* biomass by qPCR in the indicated genotypes at 5 dpi upon spray-inoculation  
612 with a suspension of 4x10<sup>6</sup> spores/ml of the fungus. *agb1-2* and *irx1-6* plants were  
613 included as susceptible and resistant controls, respectively. Data shown are relative levels  
614 of fungal  *$\beta$ -tubulin* to Arabidopsis *UBC21*, normalized to the values of wild-type (Col-0)  
615 plants. Represented data are means  $\pm$  SE, of three independent infection assays. Asterisks  
616 indicate statistically significant difference from the wild type according to Student's *t*-  
617 test (*p* -value < 0.05). (B) Macroscopic symptoms of mock and *PcBMM*-inoculated plants  
618 at 8 dpi. Photographs are from one experiment representative of three independent  
619 experiments.

620 **Figure 4.** Application of exogenous zinc restores wild type infection levels in *hma2 hma4*  
621 plants. (A) quantification of *PcBMM* biomass by qPCR of the indicated genotypes at 5  
622 dpi with a spray-inoculation with a suspension of 4x10<sup>6</sup> spores/ml of the fungus. Data  
623 shown are relative levels of fungal  *$\beta$ -tubulin* to Arabidopsis *UBC21*, normalized to Col-  
624 0 values. -Zn indicates no added zinc in the watering solution and + Zn indicates 1 mM

625 zinc sulphate used in the watering solution twice per week. Represented data are means  
626  $\pm$  SE, of three independent infection experiments. Asterisks indicate statistically  
627 significant difference from the wild type according to Student's *t*-test (*p*-value < 0.05).  
628 (B) Macroscopic symptoms of mock and *PcBMM*-inoculated plants at 8 dpi. Experiments  
629 were performed three times with similar results. Photographs are from one experiment  
630 representative of three independent experiments.

631 **Figure 5.** SA and JA/ET-signalling pathways are upregulated in *hma2 hma4* shoots. (A)  
632 Transcript levels of marker genes for the salicylic acid pathway (*PR1*), jasmonic acid  
633 pathway (*LOX2*), ethylene and jasmonate pathways (*PDF1.2*) and abscisic acid pathway  
634 (*RD22*) in shoots of mock-inoculated *hma2 hma4* relative to wild-type (Col-0) plants.  
635 Shown are mean  $\pm$  SE of three independent infection experiments, with tissues pooled  
636 from 8-10 plants per experiment. (B) Expression analysis of marker genes for the SA, JA,  
637 JA/ET and ABA signalling pathways in shoots of *hma2 hma4* relative to wild-type (Col-  
638 0) plants at 48 hpi upon inoculation with a spore suspension of *PcBMM*. Shown are mean  
639  $\pm$  SE of three independent infection experiments, with tissues pooled from 8-10 plants  
640 per experiment.

641

FIGURE 1

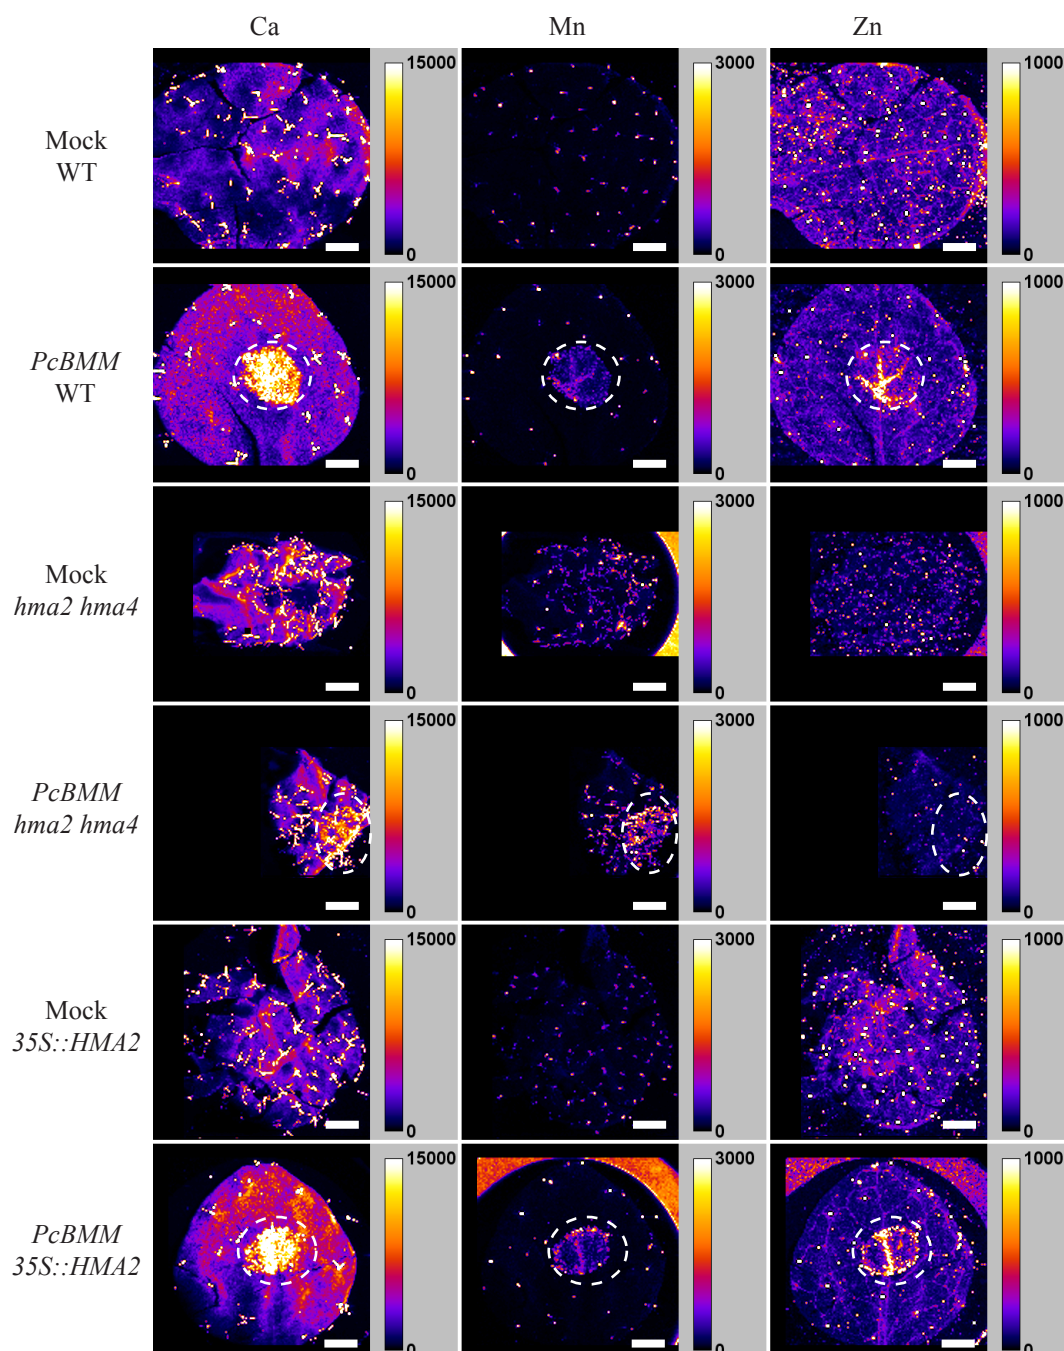

**FIGURE 2**

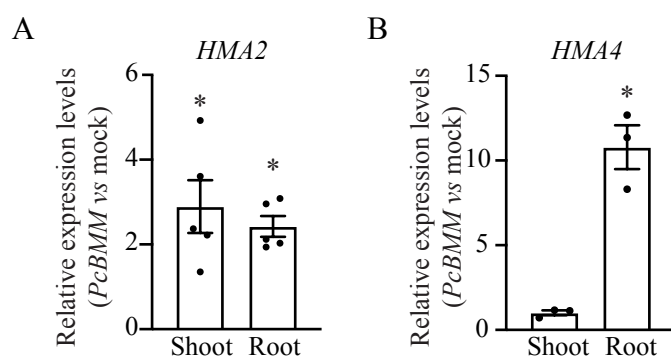

FIGURE 3

A

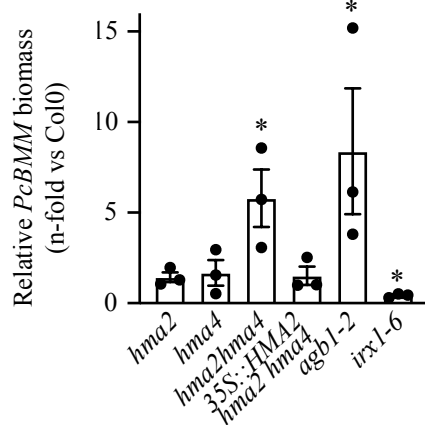

B

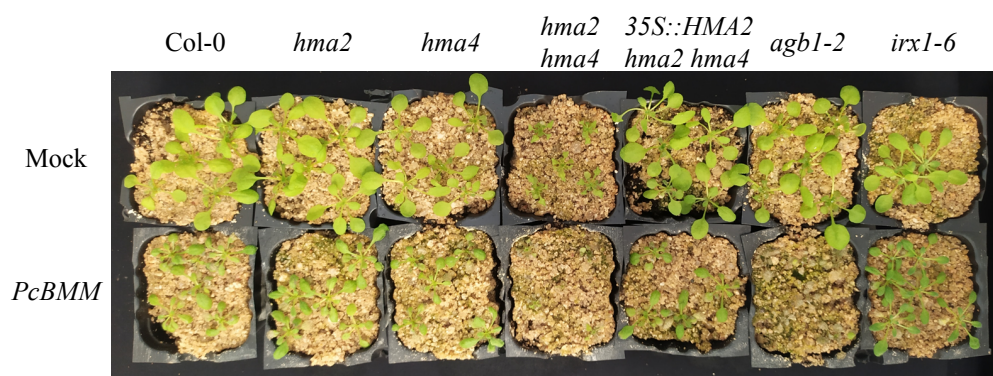



## FIGURE 4

A

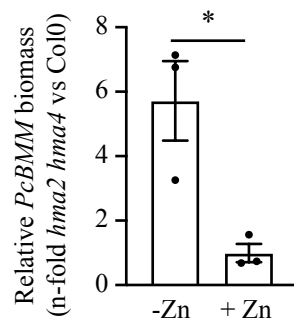

B

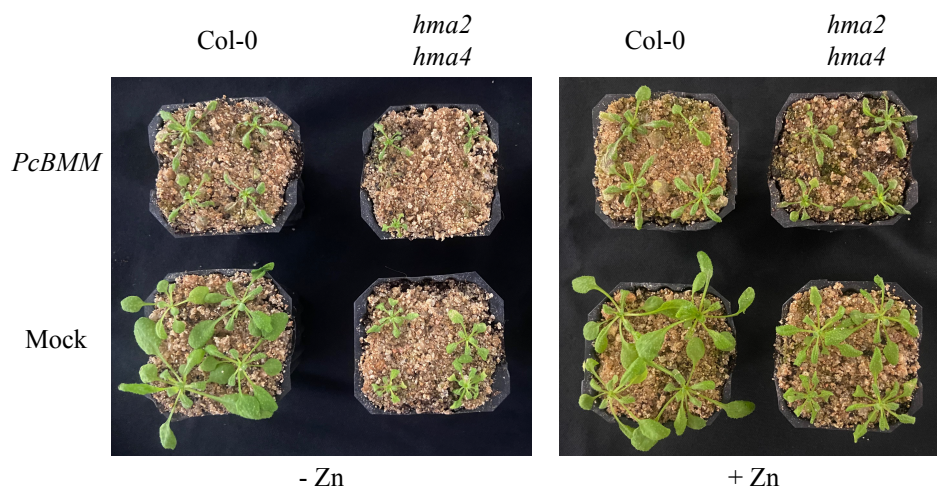

**FIGURE 5**

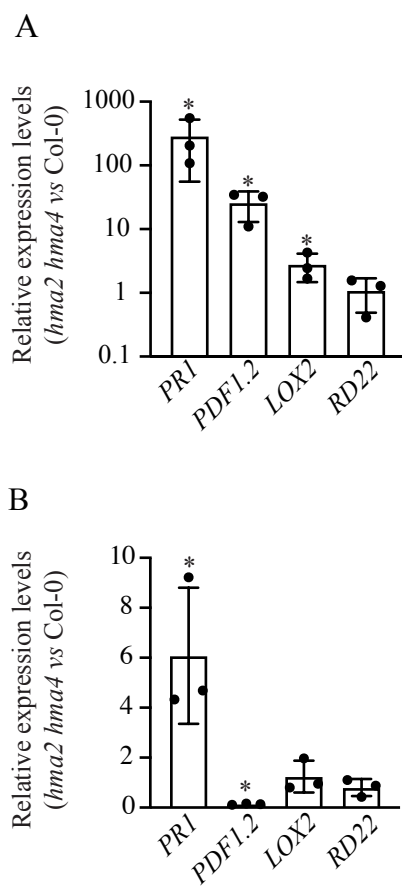

Source: https://www.biorxiv.org/content/10.1101/2020.08.10.243014v1.full.pdf
